# Supplementary material for: Diagnostic Performance and Prognostic Relevance of FDG Positron Emission Tomography/Computed Tomography for Patients with Extrahepatic Cholangiocarcinoma
Source: PubMed Central journal article supplement — Korean J Radiol. 2020 Aug 4;21(12):1355–66. doi: 10.3348/kjr.2019.0891 (PMC7689144; doi:10.3348/kjr.2019.0891), 2020-08-04
Supplement: kjr-21-1360-s001.pdf [file kjr-21-1360-s001.pdf]

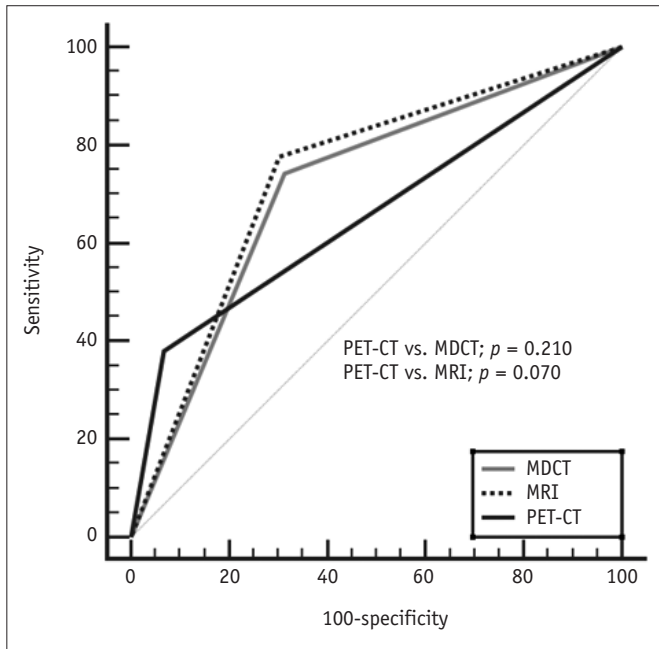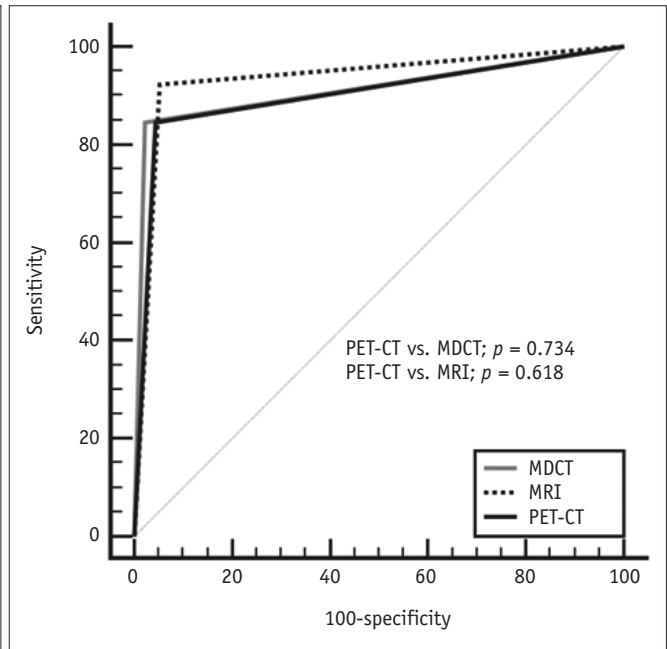

**A** **B**  
**Supplementary Fig. 1. AUROC curve for each imaging modality for (A) regional lymph node involvement and (B) distant metastases.** Overall diagnostic performance of PET-CT was not inferior compared to that of MDCT and MRI in detection of regional lymph node metastases (**A**,  $p = 0.210$  and  $p = 0.070$ ) and distant metastases (**B**,  $p = 0.734$  and  $p = 0.618$ ). AUROC = area under the receiver operating characteristic curve, MDCT = multi-detector row computed tomography, PET-CT = positron emission tomography/computed tomography
