# Supplementary material for: Diagnostic Performance and Prognostic Relevance of FDG Positron Emission Tomography/Computed Tomography for Patients with Extrahepatic Cholangiocarcinoma
Source: PubMed Central journal article supplement — Korean J Radiol. 2020 Aug 4;21(12):1355–66. doi: 10.3348/kjr.2019.0891 (PMC7689144; doi:10.3348/kjr.2019.0891), 2020-08-04
Supplement: kjr-21-1360-s002.pdf [file kjr-21-1360-s002.pdf]

**Supplementary Table 1. Detection of Distant Metastatic Lesions according to Imaging Modalities**

| Case | FDG PET-CT | MDCT       | MRI        | Metastases Site   |
|------|------------|------------|------------|-------------------|
| 1    | Detected   | Detected   | NA         | Lung, bone        |
| 2    | Detected   | Detected   | NA         | Lung, bone        |
| 3    | Detected   | Detected   | NA         | Lung              |
| 4    | Detected   | Detected   | Detected   | Liver             |
| 5    | Detected   | Detected   | NA         | Liver             |
| 6    | Detected   | Detected   | Detected   | Liver             |
| 7    | Detected   | Undetected | Detected   | Liver, bone       |
| 8    | Detected   | Undetected | NA         | Liver, bone       |
| 9    | Detected   | Undetected | NA         | Liver, bone       |
| 10   | Detected   | Detected   | Detected   | Liver, peritoneum |
| 11   | Detected   | Undetected | Detected   | Liver             |
| 12   | Detected   | Detected   | Undetected | Lung              |
| 13   | Detected   | Detected   | Detected   | Peritoneum        |
| 14   | Detected   | Detected   | Detected   | Liver             |
| 15   | Detected   | Detected   | Detected   | Liver, peritoneum |
| 16   | Detected   | Detected   | Detected   | Liver, bone, lung |
| 17   | Detected   | Detected   | Detected   | Liver             |
| 18   | Undetected | Detected   | NA         | Liver             |
| 19   | Undetected | Detected   | Detected   | Liver             |
| 20   | Undetected | Detected   | Detected   | Liver             |

FDG PET-CT = <sup>18</sup>F-fluoro-2-deoxy-D-glucose positron emission tomography/computed tomography, MDCT = multi-detector row computed tomography, NA = not available
